# Supplementary material for: Potential of a Low-iron Micronutrient Powder (MNP) for Prevention of Anemia in Children in a Low-iron Groundwater Setting: A Cross-sectional Study in Rural Bangladesh
Source: Preprints.org preprint supplement (doi:10.20944/preprints202407.2124.v1), 2024-07-26
Supplement: Supplementary file 1 [file supplementary]

**Supplementary Table 1**: Distribution of the combined intake of iron from the key sources—dietary, groundwater and the standard MNP sorted by different compliance of the MNP

| Age subgroup | RDA | EAR | Intake of iron (Dietary +Groundwater + MNP) | | | |
| --- | --- | --- | --- | --- | --- | --- |
|  |  |  | Standard MNP @85% | | Standard MNP @ 50% | |
|  |  |  | Mean ±SD, n | Median  (IQR) | Mean± SD, n | Median  (IQR) |
| 2-3 years | 7 | 3 | 13.9±2.0, 31 | 13.7  (12.5-14.9) | 9.5±2.0, 31 | 9.35  (8.1-10.5) |
| 4-5 years | 10 | 4.1 | 15.0±2.5, 91 | 14.3  (13-16.5) | 10.6±2.5,91 | 9.92  (8.6-12.1) |

RDA, Recommended Dietary Allowance; EAR, Estimated Average Intake; SD, Standard Deviation; IQR, Inter-Quartile Range

In children 2-3 years old, the combined intake i.e. mean ±SD of iron from all sources when standard MNP is considered is 13.9±2.0 mg/day [median (IQR): 13.7 (12.5-14.9) mg/day] and 9.5±2.0 mg/day [median(IQR): 9.35(8.1-10.5) mg/day] at 85% and at 50% compliance respectively. In children 4-5 years- old the combined intake of iron from all sources when standard MNP is considered is 15.0±2.5 mg/day [median (IQR): 14.3(13-16.5) mg/day] and 10.6±2.5 mg/day [median (IQR): 9.92(8.6-12.1) mg/day] at the respective compliance of MNP.

All-source intake of iron exceeded the RDA levels in both the age groups irrespective of the MNP compliance. The intake is 198.5% and 150% in the respective age groups (at the satisfactory compliance) and 135.7% and 106% (at the suboptimum compliance). If the EAR is used as the dietary reference, the exceeding s were higher—463.3% and 365.8% (at the satisfactory compliance) as well as 316.6% and 258.5% (at the suboptimum compliance).

**Supplementary Table 2: Combined Intake of Bioavailable Iron from the Key Sources when the Standard MNP is consumed at different compliance in iron-depleted and iron-replete statuses**

| Age subgroup | Absolute req. of bioavailable Fe (Median)/95th Percentile | | Amount of all-source bioavailable Fe from the key sources (Dietary +Groundwater +MNP) as per differential absorption potential of water iron sorted by differential intake profiles of the standard MNP and body- iron status | | | |
| --- | --- | --- | --- | --- | --- | --- |
|  | Median | 95th p | Differential absorption of groundwater iron | | | |
|  |  | | In case the subjects are iron-depleted * | | In case the subjects are iron-replete† | |
|  |  | | @85% intake of standard MNP | | | |
|  |  | |  | |  | |
|  |  | | Mean ± SD | Median(IQR) | Mean ± SD | Median(IQR) |
| 2-3 years | 0.46 | 0.58 | 0.86±0.24 | 0.78(0.69-1.06) | 0.69±0.11 | 0.66(0.61-0.75) |
| 4-5 years | 0.50 | 0.63 | 0.99±0.32 | 0.89(0.75-1.2) | 0.75±0.14 | 0.72(0.64-0.82) |
|  |  | | @50% intake of standard MNP | | | |
|  |  | |  | |  | |
|  |  | | Mean±SD | Median(IQR) | Mean ± SD | Median(IQR) |
| 2-3 years | 0.46 | 0.58 | 0.66±0.24 | 0.58(0.49-0.87) | 0.49±0.11 | 0.46(0.41-0.54) |
| 4-5 years | 0.50 | 0.63 | 0.79±0.32 | 0.70(0.56-1.0) | 0.55±0.14 | 0.51(0.44-0.62) |

SD, Standard Deviation; IQR, Inter-Quartile Range

*Absorption of iron 40%

†Absorption of iron 10%

In case the children are considered iron-depleted (consistent with 40% absorption of water-iron)--in case the standard MNP is used at a satisfactory level of compliance (85%), the intake of combined sources of bioavailable iron would be 0.86±0.24 mg/day and 0.99±0.32 mg/day in 2-3 years and 4-5 years old children respectively. In the event of the children being iron-replete (consistent with 10% absorption of water-iron), the intake of the bioavailable iron in 2-3 years and 4-5 years old children would be 0.69±0.11 mg/day and 0.75±0.14 mg/day respectively.

In case the standard MNP being used at the suboptimum compliance (50%), the intake of combined sources of bioavailable iron would be 0.66±0.24 mg/day and 0.79±0.32 mg/day in iron-deplete 2-3 years and 4-5 years old children respectively. Using the same MNP with the same compliance, in iron-replete 2-3 years and 4-5 years old children the intake of the all-sources bioavailable iron would be 0.49±0.11 mg/day and 0.55±0.14 mg/day respectively.
